1 **Association of sepsis and delayed cerebral ischemia in patients with aneurysmal**  
2 **subarachnoid hemorrhage**

3 Franz-Simon Centner, M.D.<sup>1</sup>; Holger Wenz, M.D.<sup>2</sup>; Mariella Eliana Oster, M.Sc.<sup>1</sup>; Franz-  
4 Joseph Dally, M.D.<sup>1,3</sup>; Johannes Sauter-Servaes, M.D.<sup>1</sup>; Tanja Pelzer, M.D.<sup>1,4</sup>; Jochen  
5 Johannes Schoettler, M.D.<sup>1</sup>; Bianka Hahn, B.Sc.<sup>1</sup>; Amr Abdulazim, M.D.<sup>5</sup>; Katharina Antonia  
6 Margarete Hackenberg, M.D.<sup>5</sup>; Christoph Groden, M.D.<sup>2</sup>; Joerg Krebs, M.D.<sup>1</sup>; Manfred Thiel,  
7 M.D.<sup>1</sup>; Nima Etminan, M.D.<sup>5</sup>; Máté Elod Maros, M.D., Ph.D., M.Sc.<sup>2,6\*</sup>

8 <sup>1</sup>Department of Anaesthesiology, Surgical Intensive Care Medicine and Pain Medicine

9 <sup>2</sup>Department of Neuroradiology

10 <sup>3</sup>Department of Orthopedics and Trauma Surgery

11 <sup>4</sup>Department of Neonatology

12 <sup>5</sup>Department of Neurosurgery

13 <sup>6</sup>Department of Biomedical Informatics at the Center for Preventive Medicine and Digital Health (CPD)

14 All at University Medical Center Mannheim, Medical Faculty Mannheim, University of Heidelberg, Theodor-Kutzer-Ufer 1-  
15 3, 68167 Mannheim, Germany

16 \***Corresponding author:** Máté E. Maros; Email: maros@uni-heidelberg.de

17 **Short title:** Association of sepsis and DCI in SAH

18 **Conflicts of Interest and Sources of Funding:** Dr. Centner, Dr. Schoettler and Prof. Dr. Thiel report  
19 funding from the Klaus Tschira Stiftung, grant number 00.277.2015. Dr. Maros reports funding from  
20 the German Ministry for Education and Research (BMBF) within the framework of the Medical  
21 Informatics Initiative (MII) MIRACUM Consortium (Medical Informatics for Holistic Disease Models  
22 in Personalized and Preventive Medicine, MIDorAI; 01ZZ2020) and unrelated consultancy for  
23 Siemens Healthineers and EppData GmbH. The funders had no role in study design, data collection  
24 and analysis, decision to publish, or preparation of the manuscript. The remaining authors have no  
25 conflicts of interest to declare.

26 **Previous presentation of the work:** Parts of this work have been presented at the 12th EuroNeuro  
27 2023 - Update on Neuroanesthesia & Neuro-Intensive Care, November 5–7 2023, Brussels, Belgium

28 This manuscript was uploaded to MedRxiv (<https://www.medrxiv.org/> ID pending).

29 **Abstract**

30 **Background:** Although sepsis and delayed cerebral ischemia (DCI) are severe complications  
31 in patients with aneurysmal subarachnoid hemorrhage (aSAH) and share pathophysiological  
32 features, their interrelation and additive effect on functional outcome is uncertain. We  
33 investigated the association of sepsis with DCI and their cumulative effect on functional  
34 outcome in patients with aSAH using current sepsis-3 definition.

35 **Methods:** Patients admitted to our hospital between 11/2014-11/2018 for aSAH were  
36 retrospectively analyzed. The main explanatory variable was sepsis, diagnosed using sepsis-3  
37 criteria. Endpoints were DCI and functional outcome at hospital discharge (modified Rankin  
38 Scale (mRS) 0-3 vs. 4-6). Propensity score matching (PSM) and multivariable logistic  
39 regressions were performed.

40 **Results:** Of 238 patients with aSAH, 55 (23%) developed sepsis and 74 (31%) DCI. After  
41 PSM, aSAH patients with sepsis displayed significantly worse functional outcome ( $p < 0.01$ )  
42 and longer ICU stay ( $p = 0.046$ ). Sepsis was independently associated with DCI (OR=2.46,  
43 95%CI: 1.28-4.72,  $p < 0.01$ ). However, after exclusion of patients who developed sepsis before  
44 (OR=1.59, 95%CI: 0.78-3.24,  $p = 0.21$ ) or after DCI (OR=0.85, 95%CI: 0.37-1.95,  $p = 0.70$ )  
45 this statistical association did not remain. Good functional outcome gradually decreased from  
46 56% (76/135) in patients with neither sepsis nor DCI, to 43% (21/48) in those with no sepsis  
47 but DCI, to 34% (10/29) with sepsis but no DCI and to 8% (2/26) in patients with both sepsis  
48 and DCI.

49 **Conclusions:** Our study demonstrates a strong association between sepsis, DCI and  
50 functional outcome in patients with aSAH and suggests a complex interplay resulting in a  
51 cumulative effect towards poor functional outcome, which warrants further studies.

52 **Key Words:** Delayed Cerebral Ischemia; Sepsis; Subarachnoid Hemorrhage; Sepsis Criteria.

53 **Introduction**

54 Both sepsis and delayed cerebral ischemia (DCI) are severe complications in patients with  
55 aneurysmal subarachnoid hemorrhage (aSAH) and are significant determinants for poor  
56 outcome<sup>1-4</sup>. The term DCI presents a pro-ischemic complication in patients who survive the  
57 initial aSAH ictus<sup>5,6</sup>. At the same time sepsis can also result in acute and long-term brain  
58 damage via cerebral ischemia<sup>7,8</sup>. Both sepsis and DCI are characterized by a dysregulation in  
59 vascular regulation and integrity<sup>9,10</sup>. DCI was mainly thought to be caused by cerebral  
60 vasospasm, however, recent studies support the concept of a multifactorial pathophysiology,  
61 including microcirculatory disturbances due to microthrombosis and neuroinflammation<sup>4,11</sup>.  
62 Microcirculatory dysfunction is also a key mechanism of septic organ dysfunction caused by  
63 direct effects of circulating mediators, capillary leak and microthrombus formation, which can  
64 affect any organ including the brain<sup>7,10</sup>. In this context, it was recently shown that systemic  
65 infection can amplify intracranial inflammatory responses in patients with aSAH<sup>12</sup>.  
66 Considering these overlapping pathophysiological features, we hypothesized that in aSAH  
67 patients the development of sepsis and DCI might be associated and may have an additive  
68 effect resulting in poor functional outcome. However, current data on the relation of sepsis  
69 and DCI in patients with aSAH are limited and inconclusive<sup>13</sup>. Although nosocomial infection  
70 was independently associated with DCI in an exploratory analysis<sup>13</sup>, two preceding studies  
71 did not find an association between sepsis and DCI<sup>9,14</sup>. These studies were, however,  
72 performed before 2016<sup>9,14</sup> and did not use the updated sepsis definition (sepsis-3), which  
73 focuses on septic organ dysfunction<sup>15</sup>. Therefore, we investigated the association of sepsis  
74 with DCI and a potential cumulative effect on functional outcome in aSAH patients using  
75 current sepsis definition.

76

77 **Methods**

78 *Study design and setting, patient selection*

79 This single-center retrospective cohort study was conducted at the 25-bed intensive care unit  
80 (ICU) of the Department of Anaesthesiology, Surgical Intensive Care Medicine and Pain  
81 Medicine at the University Medical Center Mannheim, Germany, where aSAH patients were  
82 treated and managed in close collaboration with the Department of Neurosurgery. The  
83 Medical Ethics Commission II of Medical Faculty Mannheim, University of Heidelberg,  
84 approved the study design as well as reanalysis of neuroradiological reports and imaging data  
85 (reference nr.: 2019-1096R, 2017-825R-MA and 2017-828R-MA; date of approval:  
86 01/10/2019). The need for informed consent was waived because of the retrospective nature  
87 of the study. Study design and reporting adhered to the STROBE guidelines (PMID:  
88 18064739, STrengthening the Reporting of OBservational studies in Epidemiology,  
89 <http://www.strobe-statement.org>). The study was registered at the German Clinical Trials  
90 Register (ID: DRKS00030748, <https://drks.de/search/en/trial/DRKS00030748>).

91 Data on all patients (age  $\geq$  18 years) treated in our ICU between 11/2014 and 11/2018 were  
92 extracted from an electronic health record database (Fig. 1). Of 3961 patients, 340 (8.6%)  
93 patients were preselected via ICD codes for spontaneous subarachnoid hemorrhage (code  
94 I60.\*). For 256 patients, aneurysmal subarachnoid hemorrhage on initial computed  
95 tomography (CT) scan was verified by an experienced neuroradiologist (H.W.). In a further  
96 step, 18 (7.0%) patients who did not receive aneurysm repair because of disease severity were  
97 excluded, resulting in 238 patients as final study cohort (Fig. 1, Supplemental digital content  
98 (SDC) 1: Table S1 showing reasons for exclusion).

99

100 *Clinical assessment*

101 All patients were screened for healthcare-associated infections according to center for disease  
102 control (CDC) criteria<sup>16</sup>. For all patients who developed an infection, sequential organ failure

103 assessment (SOFA) scores<sup>17</sup> were determined for 24-hour periods by intensive care  
104 physicians. To ensure comparability of sepsis criteria application with the original approach  
105 of sepsis-3 definition<sup>15</sup>, sepsis-3 criteria were applied using an automated algorithm as  
106 previously described<sup>18</sup>. Baseline characteristics (age, sex, length of stay (LOS) in ICU and in-  
107 hospital mortality) were extracted from the electronic health records. Radiological imaging  
108 findings were evaluated by an experienced neuroradiologist (H.W.). Clinical parameters were  
109 extracted and verified by intensive care physicians: pre-existing illnesses, World Federation  
110 of Neurological Surgeons SAH grading scale (WFNS) at admission, placement of an external  
111 ventricular drainage (EVD), type of aneurysm repair and modified Rankin Scale (mRS) at  
112 hospital discharge. DCI as primary endpoint was defined as proposed by Vergouwen et al.<sup>6</sup>,  
113 based on neuroimaging of cerebral infarction from DCI with the following conditions: the  
114 presence of cerebral infarction on CT or MR scan of the brain within 6 weeks after SAH, or  
115 on the latest CT or MR scan made before death within 6 weeks, not present on the CT or MR  
116 scan between 24 and 48 hours after early aneurysm occlusion, and not attributable to other  
117 causes such as surgical clipping or endovascular treatment. Hypodensities on CT imaging  
118 resulting from ventricular catheter or intraparenchymal hematoma were not regarded as  
119 cerebral infarctions from DCI<sup>6</sup>. Clinical management was performed as described in detail  
120 previously and the procedures followed were in accordance with institutional guidelines<sup>2,19</sup>.  
121 Since January 2016, an updated protocol for standardized detection and management of DCI  
122 was implemented by the Department of Neurosurgery in line with our previous studies<sup>19-21</sup>.  
123 We adjusted for these changes in DCI treatment protocol during all our analyses by  
124 incorporating a binary (yes/no) factor variable (DCI protocol). Patients with infections and  
125 sepsis were treated in accordance with current recommendations<sup>22</sup>.

126

127 *Statistical analysis*

128 Normally distributed variables were described using their means and standard deviations  
129 (SD), non-normally distributed variables with their medians, lower and upper quartile (LQ-  
130 UQ), while proportions were shown for categorical variables. All analyses were performed  
131 with the R statistics program™ (v.4.3.2, R Core Team 2023, Vienna Austria; RStudio IDE v.  
132 2023.12.0 Build 554, Boston, MA, USA). Statistical analyses and their results were reported  
133 in accordance with the Statistical Analyses and Methods in the Published Literature (SAMPL)  
134 guidelines<sup>23</sup>.

135 The main research question, and explanatory variable of interest, was the effect of sepsis on  
136 the development of DCI. Therefore, we first performed propensity score matching (PSM) to  
137 adjust for potential confounders between subgroups of sepsis positive and negative patients<sup>24</sup>.  
138 Matching weights for sepsis-3 ( $n_{\text{yes\_sepsis-3}}=55$ ) subgroups were calculated using (the default  
139 settings of the matchit package) 1:1 nearest neighbor approach ( $N_{\text{total}}=238$ ;  $N_{\text{matched}}=110$ )  
140 without replacement based on propensity score distance estimated with logistic regression  
141 including the following covariates: age, sex, WFNS grading scale, intraventricular  
142 hemorrhage (IVH), DCI protocol and smoking status as well as presence of arterial  
143 hypertension. The target estimand was calculated based on the average treatment effect of the  
144 treated (ATT). Second, we applied an exploratory modeling approach using standard  
145 generalized linear models (base glm) on the original cohort<sup>25,26</sup>. For this, the primary and  
146 secondary endpoint variables were the development of DCI (yes vs. no) and functional  
147 outcome at hospital discharge (mRS 0-3 vs. 4-6), respectively. These endpoints were modeled  
148 by multivariable logistic regression (LR) adjusted for sepsis, age, smoking status, WFNS  
149 grading scale, EVD-placement and type of aneurysm repair. The target explanatory variable  
150 of interest was sepsis based on sepsis-3 criteria. As sensitivity analyses, interaction terms  
151 were added to the multivariable LR model to investigate if the main- and combination effects  
152 of DCI and sepsis stayed consistent within mRS outcomes. Data regarding the time-  
153 dependency of these research questions were lacking in the literature. Thus, the distributions

154 of time of occurrences of sepsis and DCI were described using median, LQ-UQ. Between  
155 group comparisons of un- and matched PSM cohorts (Table 2) were performed using Chi-  
156 squared test for categorical variables (with continuity correction) and two-group t-test. In case  
157 of potentially non-normally distributed continuous variables (e.g. ICU days), the Kruskal-  
158 Wallis (global test) or for two-groups the Wilcoxon-Mann-Whitney tests whereas for  
159 categorical variables with small cell counts the Fisher's exact test were used<sup>27,28</sup>. Due to the  
160 limited number of cases, it was not possible to evaluate complex multivariable models in  
161 time-varying regression frameworks<sup>29</sup>. Figures were created using the ggplot2 grammar of  
162 graphics. P-values <0.05 were considered significant. Due to the explorative nature of our  
163 analyses, p-values were not adjusted for multiple testing<sup>28</sup>.

164

## 165 **Results**

### 166 *Cohort characteristics*

167 The 238 patients with aSAH had a median age of 56 years (Q1-Q3: 50-64, range:18-83; Table  
168 1) and 70% were female. 116 (49%) patients developed any infection. When applying sepsis-  
169 3 criteria, 55 patients were diagnosed as septic, resulting in a sepsis frequency of 47%  
170 (55/116) in patients with an infection and 23% (55/238) in relation to the total cohort. This  
171 resulted in a mortality rate of 15% (8/55) within the septic subpopulation. Of all patients 31%  
172 (74/238) developed DCI, while 47% (26/55) with sepsis also developed DCI. The diagnosis  
173 of sepsis preceded the diagnosis of DCI in 65% (17/26) by a median of 43 hrs (mean=83 hrs,  
174 IQR= 49 hrs, range=1.85-468 hrs [19.5 days]). A total of 129 patients (54%) had a poor  
175 functional outcome at hospital discharge (mRS >3) and the overall in-hospital mortality was  
176 15% (35/238, Table 1).

177

### 178 *Propensity score matching*

179 PSM was performed for the development of sepsis. Variables included established risk factors  
180 for DCI<sup>30</sup> such as smoking, sex, diabetes and arterial hypertension. Unmatched control cases  
181 were excluded from univariate analyses (n=128).

182 Before PSM (n=238, Table 2) diabetes, modified Fisher, IVH, EVD-placement, DCI,  
183 infection, functional outcome and ICU LOS were significantly different between septic and  
184 non-septic patients. After propensity score matching (n=110), infection (p<0.01) and ICU  
185 LOS (p=0.046) remained significant and among the 55 matched patients without sepsis, 27  
186 (49%) had poor functional outcomes, contrasting with 43 patients (78%) who developed  
187 sepsis (p<0.01, Table 2).

188

#### 189 *Association between sepsis and DCI*

190 In multivariable LR fitted on complete cases (n=238, Table 1) of the original cohort, sepsis  
191 demonstrated an independent association with the occurrence of DCI (adjusted odds ratio  
192 (aOR)=2.46, 95%CI: 1.28-4.72, p=0.007; Table 3 and Fig. 2A). The history of smoking  
193 slightly missed statistical significance with DCI (p=0.054, Fig. 2A).

194 To further scrutinize the link between DCI and sepsis, we performed two sensitivity analyses.  
195 First, we excluded patients who developed sepsis after DCI (n=9) from the cohort, only  
196 focusing on cases in whom sepsis preceded DCI. This LR model indicated a trend towards  
197 increased odds of DCI if sepsis was diagnosed (aOR=1.59, 95%CI: 0.78-3.24, p=0.21; Table  
198 3). Second, patients who developed sepsis before DCI (n=17) were excluded, focusing on  
199 cases in whom DCI preceded sepsis. In this LR analysis, there was no apparent association  
200 between DCI and sepsis (aOR=0.85, 95%CI: 0.37-1.95, p=0.70; SDC 1: Table S2 showing  
201 subgroup analysis).

202

#### 203 *Association of sepsis and DCI with functional outcome*



204 In multivariable LR models containing all cases (n=238) of the original cohort, sepsis was  
205 independently associated with poor functional outcome (mRS >3) at hospital discharge with  
206 an aOR=2.85 (95%CI: 1.23-6.63, p=0.02; Fig. 2B and SDC 1: Table S3 showing results of  
207 multivariable LR model for functional outcome). Age (aOR=1.84, 95%CI: 1.29-2.62,  
208 p<0.01), EVD-placement (aOR=21.87, 95%CI: 6.76-70.77, p<0.01) and DCI (aOR=2.45,  
209 95%CI: 1.18-5.07, p=0.02) were additional predictors of poor functional outcome.

210 Furthermore, we evaluated the effects of potential interactions between sepsis and DCI  
211 regarding functional outcome (SDC 1: Table S4 showing sensitivity analysis with  
212 interaction). Sepsis showed an interaction with DCI (aOR=11.05, 95%CI: 1.31-93.27, p=0.03)  
213 and neither of these variables remained independently associated (p=0.53 for sepsis and  
214 p=0.27 for DCI) in the interaction model (SDC 1: Table S4). Thus, indicating that the main  
215 effect of sepsis and DCI on functional outcome could not be independently interpreted from  
216 each other.

217 The proportion of patients with good functional outcome (mRS 0-3) gradually decreased in  
218 subgroups of patients from 56% (76/135) in those with neither sepsis nor DCI, to 43% (21/48)  
219 in those with no sepsis but DCI, to 34% (10/29) in patients with sepsis but no DCI and to 8%  
220 (2/26) in those with both sepsis and DCI.

221

## 222 **Discussion**

223 The primary aim of the present study was to investigate the association of sepsis with DCI  
224 and a potential cumulative effect of sepsis and DCI on functional outcome in a cohort of  
225 patients with aSAH using current sepsis definition. Because of overlapping  
226 pathophysiological features, we hypothesized that sepsis and DCI might be associated and  
227 have a cumulative effect on poor functional outcome. In our cohort of aSAH patients, sepsis  
228 was independently associated with DCI. However, when patients that developed sepsis before  
229 or after DCI were excluded, this association did not remain. If sepsis preceded DCI, we found

230 a trend towards a higher probability of developing DCI, which was probably limited by the  
231 sample size. Nonetheless, sepsis was confirmed as an independent risk factor for poor  
232 functional outcome in patients with aSAH. The worst functional outcome was observed in  
233 patients who suffered from both sepsis and DCI.

234 Robust data on the association of sepsis and DCI in patients with aSAH are limited and  
235 inconclusive<sup>13</sup>. A previous study by Foreman et al. described an independent association  
236 between nosocomial infection and DCI<sup>13</sup>. However, in their study no differentiation between  
237 localized and systemic infection was made<sup>13</sup>. Jeon et al. reported that sepsis was neither  
238 associated with DCI nor with mRS>3 at 3 months after SAH<sup>14</sup>. In a relatively small cohort of  
239 98 aSAH patients, Budohosky et al. found a trend towards increased odds of DCI in patients  
240 with sepsis (OR=4.4, 95%CI: 0.08–25.2; p=0.095)<sup>9</sup>. Although the used sepsis  
241 operationalization was shown to be important in studies on sepsis-associated outcomes in  
242 critically ill patients in general<sup>18,31</sup> and in patients with aSAH specifically<sup>2,32</sup>, neither of the  
243 aforementioned studies included details about the utilized sepsis definition. Additionally, both  
244 studies were performed before 2016<sup>9,14</sup> and did not apply the updated sepsis-3 definition that  
245 focuses on septic organ dysfunction<sup>15</sup>. To our knowledge, this is the first study evaluating  
246 sepsis-3 criteria for the association between sepsis and DCI in patients with aSAH.

247 We observed a strong association between sepsis and DCI in the total cohort. When patients  
248 who developed sepsis after DCI were excluded from the analysis, thereby focusing on the  
249 effect of sepsis preceding DCI, the association between sepsis and DCI was no longer  
250 statistically significant but indicated a potential trend towards a positive association with DCI.

251 Thus, we assume that a larger, potentially multi-centric cohort could improve statistical power  
252 and underscore their temporal association. This notion was also supported by the sensitivity  
253 analysis focusing on patients who developed sepsis after DCI, in which no relevant  
254 association between sepsis and DCI could be identified. These findings hint to a rather  
255 complex interplay between sepsis and DCI.

256 The observed association between sepsis and DCI in the present study might be explained by  
257 overlapping pathophysiological effects of sepsis in the brain and DCI. Both conditions are  
258 characterized by vascular dysfunction including dysregulation of cerebral vascular tone and  
259 impairment of vascular autoregulation<sup>3,9,32</sup>. While DCI can occur independently from cerebral  
260 vasospasm, there is still a strong association between angiographic vasospasm with  
261 neurological worsening, cerebral infarction, and poor outcome<sup>5</sup>. Simultaneously, in contrast to  
262 systemic vasodilation in early sepsis, vasoconstriction of the resistance arterioles in the brain  
263 occurs in patients with sepsis-associated encephalopathy<sup>33</sup>. Of note is the fact that the titration  
264 of the systemic circulation to a specific blood pressure target with vasopressors will not  
265 automatically restore cerebral perfusion in septic patients<sup>34</sup>. In recent years, again for both  
266 sepsis-associated encephalopathy and DCI, new evidence has been established that factors  
267 beyond a disturbed macrocirculation of cerebral blood vessels play an important role in the  
268 pathophysiology including microcirculatory disturbances due to endothelial dysfunction,  
269 neuroinflammation and microthrombosis with consecutive disruption of the blood-brain  
270 barrier and cellular injury<sup>11,35-37</sup>.

271 While DCI is defined as cerebral ischemia due to sequelae of SAH<sup>6</sup>, sepsis can cause cerebral  
272 ischemia via the multifactorial pathophysiological processes described above<sup>7,8,35</sup>. Hence,  
273 both sepsis and DCI are associated with derangements of vascular tone and integrity,  
274 microthrombosis formation and neuroinflammation resulting in cerebral ischemia<sup>4,8,11,35</sup>.  
275 These pathophysiological effects are concordant with the results of the present study in that  
276 both sepsis and DCI were independent risk factors for poor functional outcome in our cohort  
277 of aSAH patients. Sepsis is known to be independently associated with persistent new  
278 cognitive impairment and functional disability among survivors in general populations<sup>38</sup> and  
279 might contribute to brain dysfunction after SAH as a second hit to an already vulnerable  
280 brain<sup>1</sup>. Accordingly, the relevance of sepsis on the functional outcome in patients with aSAH  
281 was shown before<sup>1,39,40</sup> and confirmed in the present study. Interestingly, our analysis

282 revealed a significant interaction between sepsis and DCI and showed that their effects on  
283 functional outcome could not be interpreted independently from each other. Furthermore,  
284 sensitivity analyses suggested that temporal characteristics of sepsis and DCI occurrence are  
285 of relevance. In line with this, we observed a gradual decrease of the proportion of patients  
286 with good functional outcome in the presence of DCI and sepsis. Only 8% of patients who  
287 suffered from sepsis and DCI achieved an mRS 0-3 outcome, which underlines a cumulative  
288 effect that warrants further research. In this context, it has been recently shown that systemic  
289 infection can increase intracranial inflammatory responses in patients with aSAH<sup>12</sup>, which  
290 might be a promising approach to further investigate the here established associations  
291 between sepsis, DCI and functional outcome. Further investigation into the temporal course of  
292 sepsis, the systemic immune response and the development of DCI could be helpful to better  
293 define the relationship<sup>13</sup>.

294 Our study has several limitations: First, the data are derived from a single-center retrospective  
295 cohort study. However, the retrospective nature permitted the inclusion of all available  
296 information independent from temporal occurrence and for the comprehensive description of  
297 infectious complications. Concurrently, the retrospective design prevented conclusions about  
298 cause–effect inferences.

299 In conclusion, the present study is, to our knowledge, the first to demonstrate a significant  
300 association between sepsis and DCI in aSAH patients and indicate the relevance of their  
301 temporal association. Sepsis was confirmed as an independent risk factor for poor functional  
302 outcome at hospital discharge. Furthermore, the co-occurrence of sepsis and DCI led to a  
303 cumulative effect towards poor functional outcome. Our analyses highlight the significant  
304 impact of sepsis on the disease course of aSAH patients suggesting a complex interplay  
305 between sepsis and DCI, which warrants further research on this topic.

306 **Acknowledgements**

307 We are grateful to Prof. Dr. Gabriel J.E. Rinkel for his valuable comments and helpful advice.

308

309 **References:**

- 310 1. Gonçalves B, Kurtz P, Turon R, Santos T, Prazeres M, Righy C, Bozza FA. Incidence  
311 and impact of sepsis on long-term outcomes after subarachnoid hemorrhage: a  
312 prospective observational study. *Annals of Intensive Care*. 2019;9:94.
- 313 2. Centner FS, Oster ME, Dally FJ, Sauter-Servaes J, Pelzer T, Schoettler JJ, Hahn B,  
314 Fairley AM, Abdulazim A, Hackenberg KAM, et al. Comparative Analyses of the  
315 Impact of Different Criteria for Sepsis Diagnosis on Outcome in Patients with  
316 Spontaneous Subarachnoid Hemorrhage. *Journal of clinical medicine*. 2022;11. doi:  
317 10.3390/jcm11133873
- 318 3. Eagles ME, Tso MK, Macdonald RL. Cognitive Impairment, Functional Outcome,  
319 and Delayed Cerebral Ischemia After Aneurysmal Subarachnoid Hemorrhage. *World*  
320 *Neurosurg*. 2019. doi: 10.1016/j.wneu.2018.12.152
- 321 4. Abdulazim A, Heilig M, Rinkel G, Etminan N. Diagnosis of Delayed Cerebral  
322 Ischemia in Patients with Aneurysmal Subarachnoid Hemorrhage and Triggers for  
323 Intervention. *Neurocrit Care*. 2023. doi: 10.1007/s12028-023-01812-3
- 324 5. Vergouwen MD, Ilodigwe D, Macdonald RL. Cerebral infarction after subarachnoid  
325 hemorrhage contributes to poor outcome by vasospasm-dependent and-independent  
326 effects. *Stroke*. 2011;42:924-929.
- 327 6. Vergouwen MD, Vermeulen M, van Gijn J, Rinkel GJ, Wijdicks EF, Muizelaar JP,  
328 Mendelow AD, Juvela S, Yonas H, Terbrugge KG. Definition of delayed cerebral  
329 ischemia after aneurysmal subarachnoid hemorrhage as an outcome event in clinical  
330 trials and observational studies: proposal of a multidisciplinary research group. *Stroke*.  
331 2010;41:2391-2395.
- 332 7. Pan S, Lv Z, Wang R, Shu H, Yuan S, Yu Y, Shang Y. Sepsis-Induced Brain  
333 Dysfunction: Pathogenesis, Diagnosis, and Treatment. *Oxid Med Cell Longev*.  
334 2022;2022:1328729. doi: 10.1155/2022/1328729
- 335 8. Sharshar T, Annane D, de la Grandmaison GL, Brouland JP, Hopkinson NS,  
336 Françoise G. The neuropathology of septic shock. *Brain Pathol*. 2004;14:21-33. doi:  
337 10.1111/j.1750-3639.2004.tb00494.x
- 338 9. Budohoski KP, Czosnyka M, Smielewski P, Kaspruwicz M, Helmy A, Bulters D,  
339 Pickard JD, Kirkpatrick PJ. Impairment of cerebral autoregulation predicts delayed  
340 cerebral ischemia after subarachnoid hemorrhage: a prospective observational study.  
341 *Stroke*. 2012;43:3230-3237. doi: 10.1161/strokeaha.112.669788
- 342 10. Lelubre C, Vincent JL. Mechanisms and treatment of organ failure in sepsis. *Nat Rev*  
343 *Nephrol*. 2018;14:417-427. doi: 10.1038/s41581-018-0005-7
- 344 11. Suzuki H, Kanamaru H, Kawakita F, Asada R, Fujimoto M, Shiba M. Cerebrovascular  
345 pathophysiology of delayed cerebral ischemia after aneurysmal subarachnoid  
346 hemorrhage. *Histol Histopathol*. 2021;36:143-158. doi: 10.14670/hh-18-253
- 347 12. Coelembier C, Venet F, Demaret J, Viel S, Lehot JJ, Dailler F, Monneret G,  
348 Lukaszewicz AC. Impact of Ventilator-associated Pneumonia on Cerebrospinal Fluid  
349 Inflammation During Immunosuppression After Subarachnoid Hemorrhage: A Pilot  
350 Study. *J Neurosurg Anesthesiol*. 2022;34:e57-e62. doi:  
351 10.1097/ana.0000000000000732

- 352 13. Foreman PM, Chua M, Harrigan MR, Fisher WS, 3rd, Vyas NA, Lipsky RH, Walters  
353 BC, Tubbs RS, Shoja MM, Griessenauer CJ. Association of nosocomial infections  
354 with delayed cerebral ischemia in aneurysmal subarachnoid hemorrhage. *J Neurosurg.*  
355 2016;125:1383-1389. doi: 10.3171/2015.10.Jns151959
- 356 14. Jeon SB, Choi HA, Badjatia N, Schmidt JM, Lantigua H, Claassen J, Connolly ES,  
357 Mayer SA, Lee K. Hyperoxia may be related to delayed cerebral ischemia and poor  
358 outcome after subarachnoid haemorrhage. *J Neurol Neurosurg Psychiatry.*  
359 2014;85:1301-1307. doi: 10.1136/jnnp-2013-307314
- 360 15. Singer M, Deutschman CS, Seymour CW, Shankar-Hari M, Annane D, Bauer M,  
361 Bellomo R, Bernard GR, Chiche J-D, Coopersmith CM. The Third International  
362 Consensus definitions for sepsis and septic shock (Sepsis-3). *Jama.* 2016;315:801-  
363 810.
- 364 16. Horan TC, Andrus M, Dudeck MA. CDC/NHSN surveillance definition of health  
365 care-associated infection and criteria for specific types of infections in the acute care  
366 setting. *American journal of infection control.* 2008;36:309-332.
- 367 17. Vincent J-L, Moreno R, Takala J, Willatts S, De Mendonça A, Bruining H, Reinhart  
368 C, Suter P, Thijs L. The SOFA (Sepsis-related Organ Failure Assessment) score to  
369 describe organ dysfunction/failure. *Intensive care medicine.* 1996;22:707-710.
- 370 18. Centner F-S, Schoettler JJ, Fairley A-M, Lindner HA, Schneider-Lindner V, Weiss C,  
371 Thiel M, Hagmann M. Impact of different consensus definition criteria on sepsis  
372 diagnosis in a cohort of critically ill patients—Insights from a new mathematical  
373 probabilistic approach to mortality-based validation of sepsis criteria. *PloS one.*  
374 2020;15:e0238548.
- 375 19. Abdulazim A, Küppers C, Hackenberg KAM, Neumaier-Probst E, Alzghloul MM,  
376 Krebs J, Thiel M, Lingsma H, Rinkel GJE, Groden C, et al. Multidisciplinary and  
377 standardized management of patients with delayed cerebral ischemia after aneurysmal  
378 subarachnoid hemorrhage. *Acta Neurochir (Wien).* 2022;164:2917-2926. doi:  
379 10.1007/s00701-022-05347-y
- 380 20. Etminan N, Beseoglu K, Heiroth H-J, Turowski B, Steiger HJ, Hänggi D. Early  
381 perfusion computerized tomography imaging as a radiographic surrogate for delayed  
382 cerebral ischemia and functional outcome after subarachnoid hemorrhage. *Stroke.*  
383 2013;44:1260-1266.
- 384 21. Etminan N, Beseoglu K, Eicker SO, Turowski B, Steiger H-J, Hänggi D. Prospective,  
385 randomized, open-label phase II trial on concomitant intraventricular fibrinolysis and  
386 low-frequency rotation after severe subarachnoid hemorrhage. *Stroke.* 2013;44:2162-  
387 2168.
- 388 22. Rhodes A, Evans LE, Alhazzani W, Levy MM, Antonelli M, Ferrer R, Kumar A,  
389 Sevransky JE, Sprung CL, Nunnally ME. Surviving sepsis campaign: international  
390 guidelines for management of sepsis and septic shock: 2016. *Intensive care medicine.*  
391 2017;43:304-377.
- 392 23. Lang TA, Altman DG. Basic statistical reporting for articles published in biomedical  
393 journals: the "Statistical Analyses and Methods in the Published Literature" or the  
394 SAMPL Guidelines. *Int J Nurs Stud.* 2015;52:5-9. doi: 10.1016/j.ijnurstu.2014.09.006
- 395 24. Flottmann F, van Horn N, Maros ME, Leischner H, Bechstein M, Meyer L, Sauer M,  
396 Deb-Chatterji M, Alegiani A, Thomalla G, et al. More Retrieval Attempts are  
397 Associated with Poorer Functional Outcome After Unsuccessful Thrombectomy. *Clin*  
398 *Neuroradiol.* 2022;32:361-368. doi: 10.1007/s00062-021-01054-w
- 399 25. Christoffersen B. Comparing methods for time varying logistic models.  
400 [http://cran.r-nexr.com/web/packages/dynamichazard/vignettes/Comparing\\_methods\\_for](http://cran.r-nexr.com/web/packages/dynamichazard/vignettes/Comparing_methods_for_logistic_models.pdf)  
401 [\\_logistic\\_models.pdf](http://cran.r-nexr.com/web/packages/dynamichazard/vignettes/Comparing_methods_for_logistic_models.pdf). 2017.

- 402 26. Atkinson TTCCE. Using Time Dependent Covariates and Time Dependent  
403 Coefficients in the Cox Model. [https://cran.r-](https://cran.r-project.org/web/packages/survival/vignettes/timedep.pdf)  
404 [project.org/web/packages/survival/vignettes/timedep.pdf](https://cran.r-project.org/web/packages/survival/vignettes/timedep.pdf). 2023.
- 405 27. Kazuki Yoshida AB, Jonathan J Chipman, Justin Bohn, Lucy DAgostino McGowan,  
406 Malcolm Barrett, Rune Haubo B Christensen, gbouzill. Create 'Table 1' to Describe  
407 Baseline Characteristics with or without Propensity Score Weights. [https://cran.r-](https://cran.r-project.org/web/packages/tableone/tableone.pdf)  
408 [project.org/web/packages/tableone/tableone.pdf](https://cran.r-project.org/web/packages/tableone/tableone.pdf). 2022.
- 409 28. Wenz H, Maros ME, Meyer M, Förster A, Haubenreisser H, Kurth S, Schoenberg SO,  
410 Flohr T, Leidecker C, Groden C, et al. Image Quality of 3rd Generation Spiral Cranial  
411 Dual-Source CT in Combination with an Advanced Model Iterative Reconstruction  
412 Technique: A Prospective Intra-Individual Comparison Study to Standard Sequential  
413 Cranial CT Using Identical Radiation Dose. *PLoS one*. 2015;10:e0136054. doi:  
414 10.1371/journal.pone.0136054
- 415 29. Weyer V, Maros ME, Kronfeld A, Kirschner S, Groden C, Sommer C, Tanyildizi Y,  
416 Kramer M, Brockmann MA. Longitudinal imaging and evaluation of SAH-associated  
417 cerebral large artery vasospasm in mice using micro-CT and angiography. *Journal of*  
418 *cerebral blood flow and metabolism : official journal of the International Society of*  
419 *Cerebral Blood Flow and Metabolism*. 2020;40:2265-2277. doi:  
420 10.1177/0271678x19887052
- 421 30. de Rooij NK, Rinkel GJ, Dankbaar JW, Frijns CJ. Delayed cerebral ischemia after  
422 subarachnoid hemorrhage: a systematic review of clinical, laboratory, and radiological  
423 predictors. *Stroke*. 2013;44:43-54. doi: 10.1161/strokeaha.112.674291
- 424 31. Verboom DM, Frencken JF, Ong DS, Horn J, van der Poll T, Bonten MJ, Cremer OL,  
425 Klouwenberg PMK. Robustness of sepsis-3 criteria in critically ill patients. *Journal of*  
426 *intensive care*. 2019;7:46.
- 427 32. Flinspach AN, Konczalla J, Seifert V, Zacharowski K, Herrmann E, Balaban Ü, Adam  
428 EH. Detecting Sepsis in Patients with Severe Subarachnoid Hemorrhage during  
429 Critical Care. *Journal of clinical medicine*. 2022;11. doi: 10.3390/jcm11144229
- 430 33. Szatmári S, Végh T, Csomós A, Hallay J, Takács I, Molnár C, Fülesdi B. Impaired  
431 cerebrovascular reactivity in sepsis-associated encephalopathy studied by  
432 acetazolamide test. *Crit Care*. 2010;14:R50. doi: 10.1186/cc8939
- 433 34. van den Brule JMD, Stolk R, Vinke EJ, van Loon LM, Pickkers P, van der Hoeven  
434 JG, Kox M, Hoedemaekers CWE. Vasopressors Do Not Influence Cerebral Critical  
435 Closing Pressure During Systemic Inflammation Evoked by Experimental  
436 Endotoxemia and Sepsis in Humans. *Shock*. 2018;49:529-535. doi:  
437 10.1097/shk.0000000000001003
- 438 35. Taccone FS, Scolletta S, Franchi F, Donadello K, Oddo M. Brain perfusion in sepsis.  
439 *Curr Vasc Pharmacol*. 2013;11:170-186. doi: 10.2174/1570161111311020007
- 440 36. Ren C, Yao RQ, Zhang H, Feng YW, Yao YM. Sepsis-associated encephalopathy: a  
441 vicious cycle of immunosuppression. *J Neuroinflammation*. 2020;17:14. doi:  
442 10.1186/s12974-020-1701-3
- 443 37. D'Souza S. Aneurysmal Subarachnoid Hemorrhage. *J Neurosurg Anesthesiol*.  
444 2015;27:222-240. doi: 10.1097/ana.0000000000000130
- 445 38. Iwashyna TJ, Ely EW, Smith DM, Langa KM. Long-term cognitive impairment and  
446 functional disability among survivors of severe sepsis. *Jama*. 2010;304:1787-1794.
- 447 39. Frontera JA, Fernandez A, Schmidt JM, Claassen J, Wartenberg KE, Badjatia N, Parra  
448 A, Connolly ES, Mayer SA. Impact of nosocomial infectious complications after  
449 subarachnoid hemorrhage. *Neurosurgery*. 2008;62:80-87.
- 450 40. Hammer A, Ranaie G, Erbguth F, Hohenhaus M, Wenzl M, Killer-Oberpfalzer M,  
451 Steiner H-H, Janssen H. impact of complications and comorbidities on the intensive

452 care Length of Stay after Aneurysmal Subarachnoid Haemorrhage. *Scientific reports*.  
453 2020;10:1-9.



454 **Figure legends**

455 **FIGURE 1.** Flow diagram of study cohort selection. ICD indicates international classification  
456 of diseases; ICU, intensive care unit, SAH, subarachnoid hemorrhage.

457

458 **FIGURE 2.** Multivariable logistic regression model-based adjusted odds ratios (aOR) for  
459 DCI (A) and poor (mRS 4-6) functional outcome (B). EVD for mRS 4-6 is not shown due to  
460 cleaner visibility and out of range point estimates and confidence intervals (aOR=21.87,  
461 95%CI:6.76-70.77,  $p<0.01$ ). Bold font and \* indicate significance at  $p<0.05$ -level. DCI  
462 indicates delayed cerebral ischemia; EVD, external ventricular drainage; mRS, modified  
463 Rankin Scale; WFNS, World Federation of Neurological Surgeons SAH grading scale.

464

465 **Tables:**

466 **TABLE 1.** Clinical and treatment characteristics of the total cohort with aneurysmal  
467 subarachnoid hemorrhage (N=238).

468 **TABLE 2.** Clinical and treatment characteristics before and after propensity score matching  
469 (PSM) for cases with sepsis.

470 **TABLE 3.** Multivariable logistic regression models including sensitivity analysis for the  
471 primary endpoint: delayed cerebral ischemia (DCI).

472 Tables.docx

473

474 **Supplemental digital content 1**

475 **TABLE S1.** Reasons for exclusion during neuroradiological validation.

476 **Table S2.** Sensitivity analysis: multivariable logistic regression model ( $N_{\text{sens}}=221$ ) for delayed  
477 cerebral ischemia (DCI) excluding patients who developed sepsis before DCI ( $N_{\text{excluded}}=17$ ).

478 **TABLE S3.** Multivariable logistic regression model for functional outcome (mRS 0-3 vs. 4-  
479 6).

480 **TABLE S4.** Sensitivity analysis including comparative statistics of multivariable logistic  
481 regression model (N=238) additionally adjusted for interaction between sepsis and DCI  
482 regarding functional outcome (mRS 0-3 vs. 4-6).

483 SDC1.docx

**A** Delayed Cerebral Ischemia (DCI)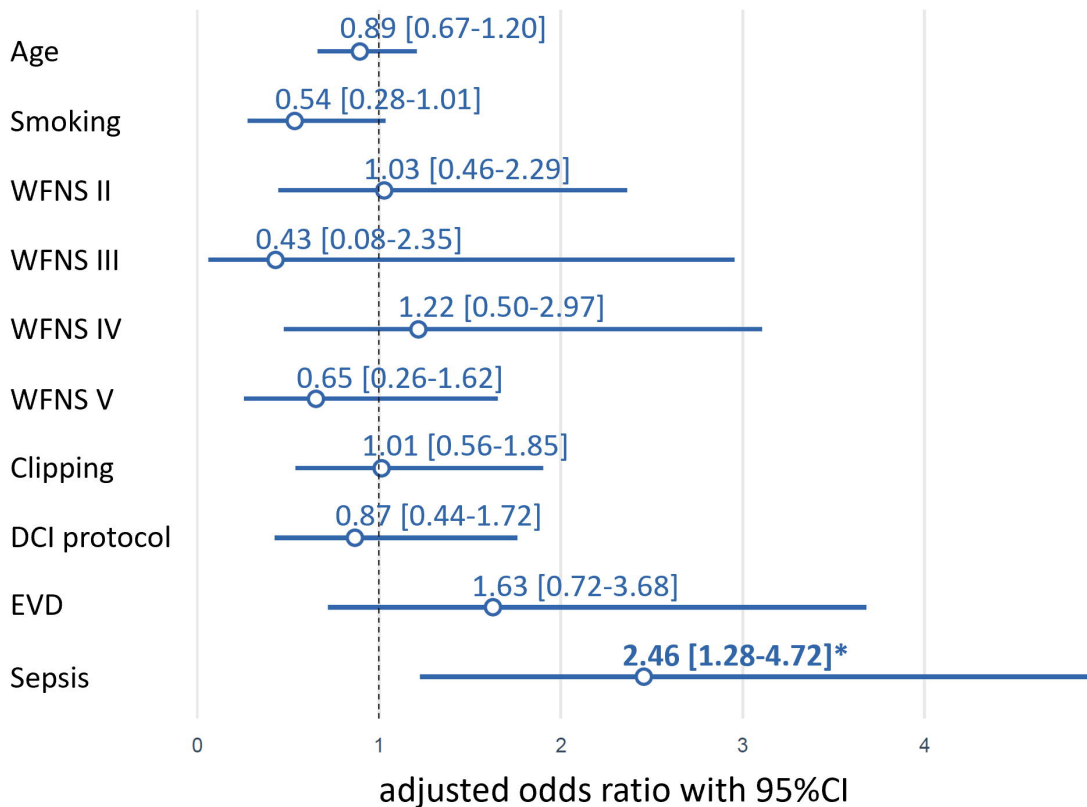**B** Poor functional outcome (mRS 4-6)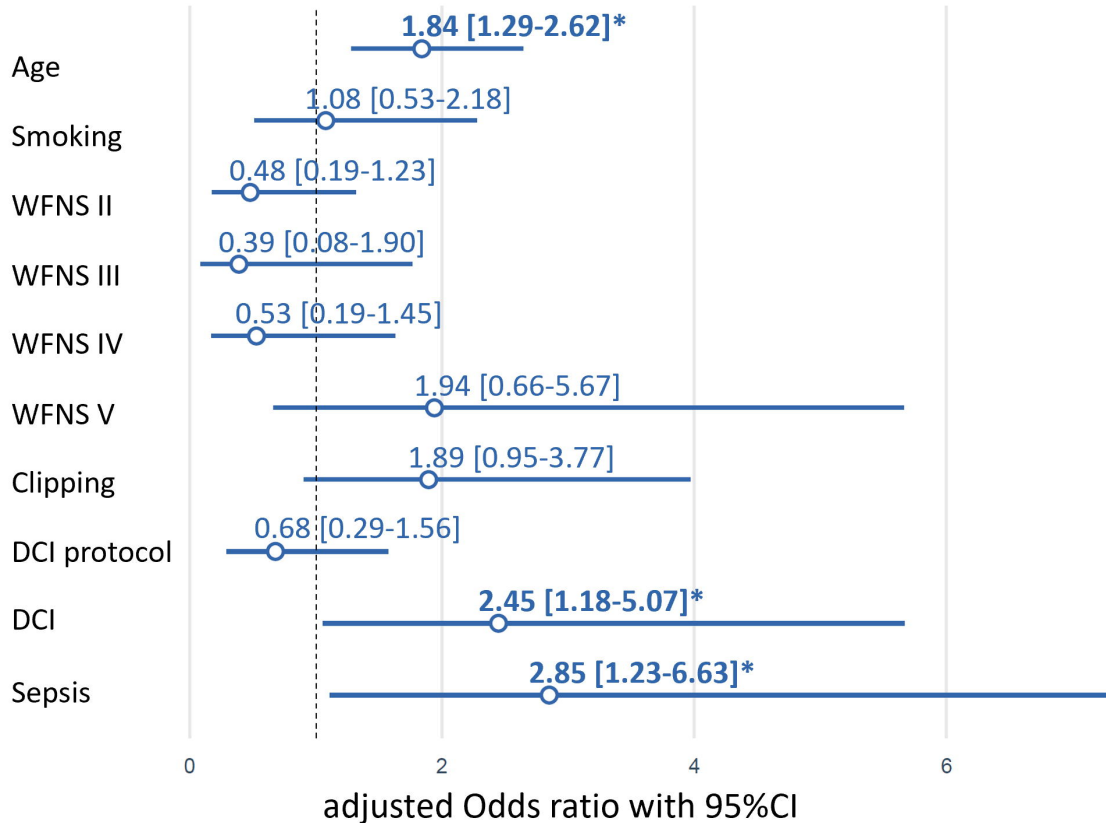

**3961** ICU admissions between 11/2014 and 11/2018

*Automated record search*

**340** patients with ICD code for spontaneous SAH

*Neuroradiological validation*

**256** patients with validated aneurysmal SAH

*Exclusion of patients without aneurysm repair*

**238** study patients

**55** septic patients

**183** non-septic patients
